# Supplementary material for: The Sb/SbPO4@3D-G composite as a promising anode material for sodium-ion batteries
Source: Royal Society of Chemistry journal article supplement (doi:10.1039/d0qi00293c), 2020-01-01
Supplement: d0qi00293c1.pdf [file d0qi00293c1.pdf]

## Supplemental Material

### **Sb/SbPO<sub>4</sub>@3D-G Composite as a Promising Anode Material for Sodium-Ion Batteries**

Tingzhen Xie<sup>†a</sup>, Zhigang Zhang<sup>†a</sup>, Xiaoping Lin<sup>†a</sup>, Yidong Shen<sup>†a</sup>, Qihong Li<sup>\*†a</sup>

*a Pen-Tung Sah Institute of Micro-Nano Science and Technology, Xiamen University, Xiamen 361005, China.*

\*Corresponding author.

*E-mail address:* liqihong@xmu.edu.cn

Supplemental Information consists of one table and eight figures over eleven pages.

Figure S1 is about photo of Sb<sub>2</sub>O<sub>3</sub>@3D-G, Figure S2 is about XRD patterns of Sb<sub>2</sub>O<sub>3</sub>, Figure S3 and Figure S5 are about SEM images of Sb/SbPO<sub>4</sub>@3D-G, Figure S4 is about BET result, Figure S6 is about long cycle performance of SSPG-M, Figure S7 is about SEM images of Sb/SbPO<sub>4</sub>@3D-G after cycles. Figure S8 is about the cycling performance comparison, and the Table S1 is about comparison of the electrochemical performance of Sb-based materials for SIBs.

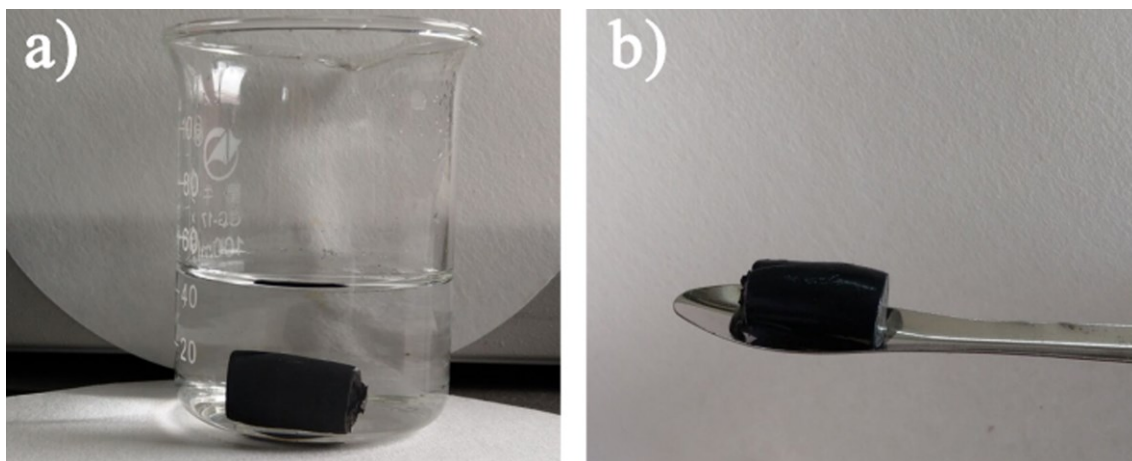

**Fig. S1. The photo of black hydrogel  $\text{Sb}_2\text{O}_3@3\text{D-G}$ .**

**Fig. S1** displays the photo of  $\text{Sb}_2\text{O}_3@3\text{D-G}$ . The product is a black hydrogel and elastic with dense structure.

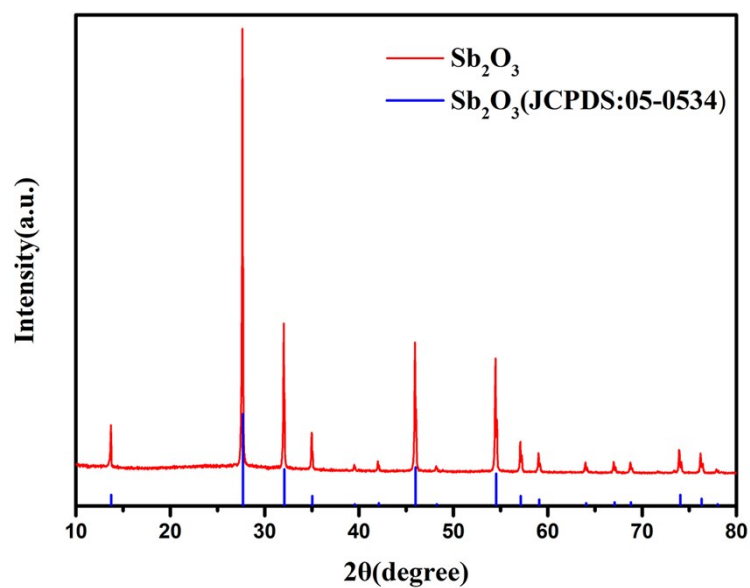

**Fig. S2. XRD pattern of  $\text{Sb}_2\text{O}_3$ .**

**Fig. S2** shows the XRD pattern of  $\text{Sb}_2\text{O}_3$ . It is evident that all the diffraction peaks are in good accordance with the corresponding crystal planes of cubic  $\text{Sb}_2\text{O}_3$  (JCPDS No.05-0534).

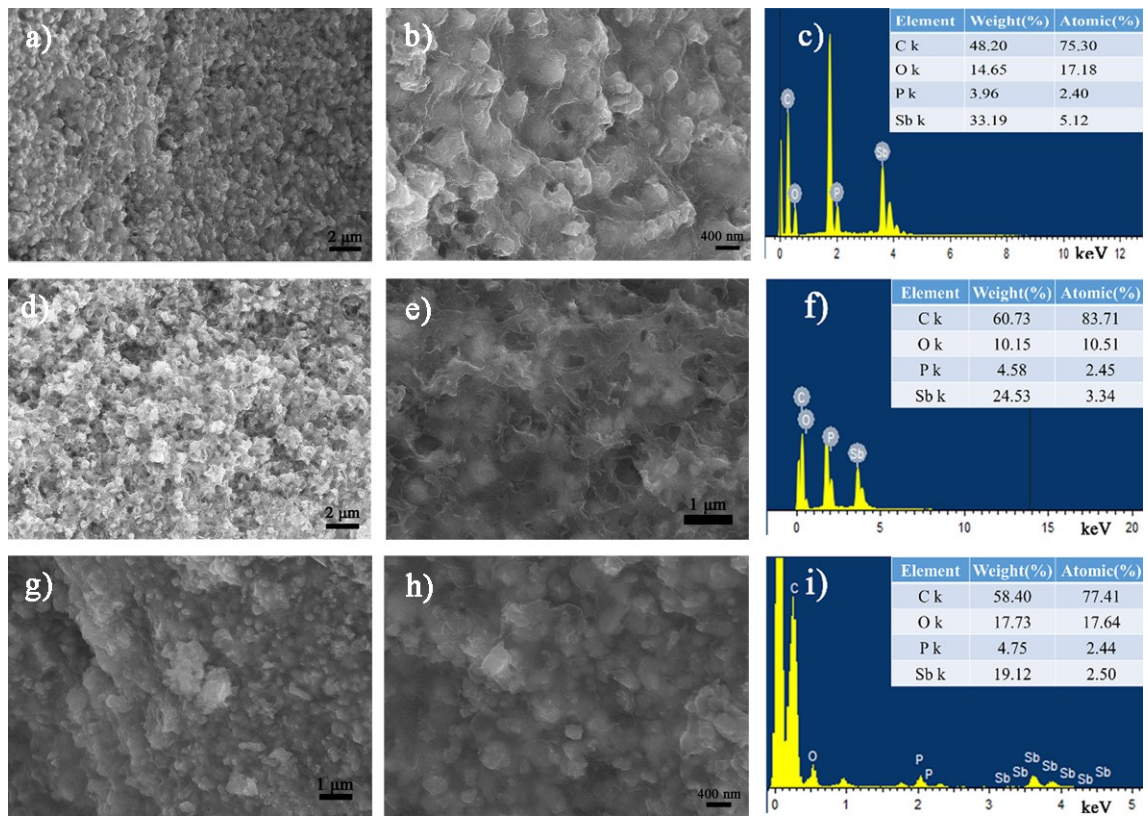

**Fig. S3. SEM images and EDS spectrum of a-c) SSPG-M; d-f) SSPG-L; and g-i) SbPO<sub>4</sub>@3D-G.**

**Fig. S3** shows SEM images and EDS spectrum of SSPG-M, SSPG-L and SbPO<sub>4</sub>@3D-G. There are no distinct differences in morphology of three samples. The EDS results are accordant with the element ratios in relevant products.

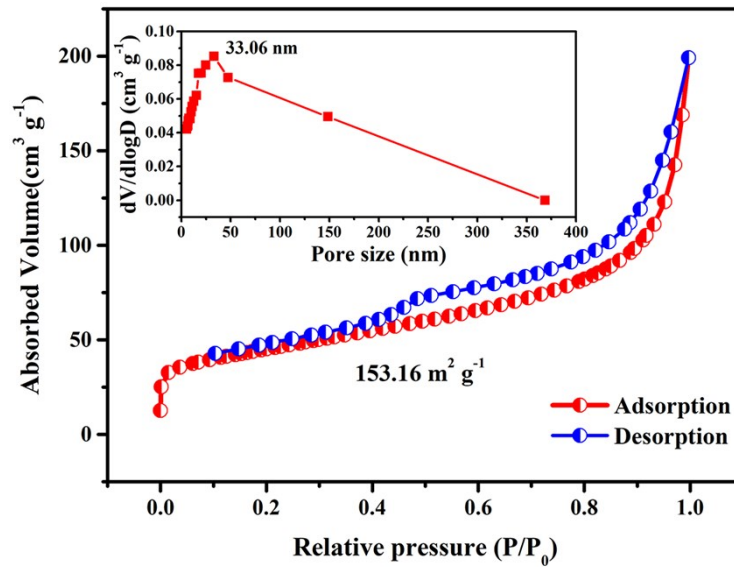

**Fig. S4. Nitrogen adsorption-desorption isotherm and pore size distribution of SSPG-M.**

**Fig. S4** shows the nitrogen adsorption-desorption isotherm and pore size distribution of SSPG-M. The specific surface area was calculated according to the Brunauer-Emmett-Teller (BET) method and the pore size distribution was analyzed by Barrett-Joyner-Halenda (BJH) method. The SSPG-M sample shows an IV-type adsorption-desorption isothermal curve, and the specific surface area is about 153.16 m<sup>2</sup> g<sup>-1</sup>.

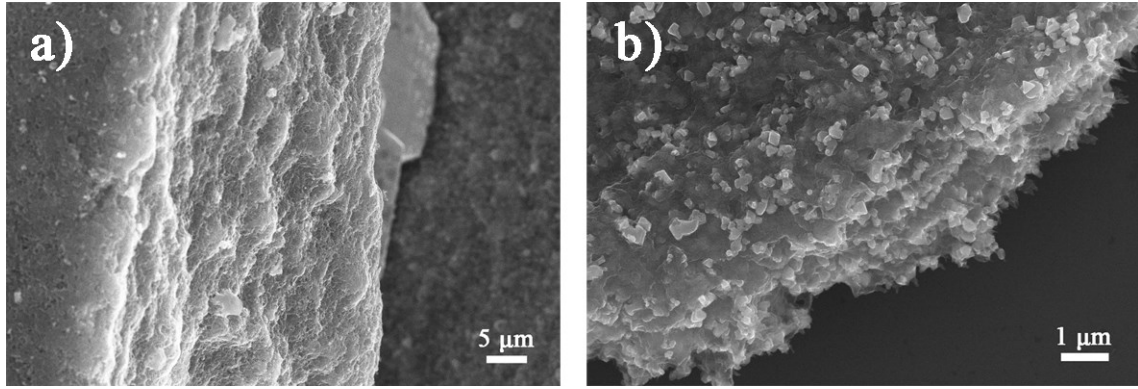

**Fig. S5. The lateral morphology of Sb/SbPO<sub>4</sub>@3D-G: a) in whole; b) in partial.**

**Fig. S5** shows the lateral morphology of Sb/SbPO<sub>4</sub>@3D-G. It is clear that the graphene layers are stacked layer by layer.

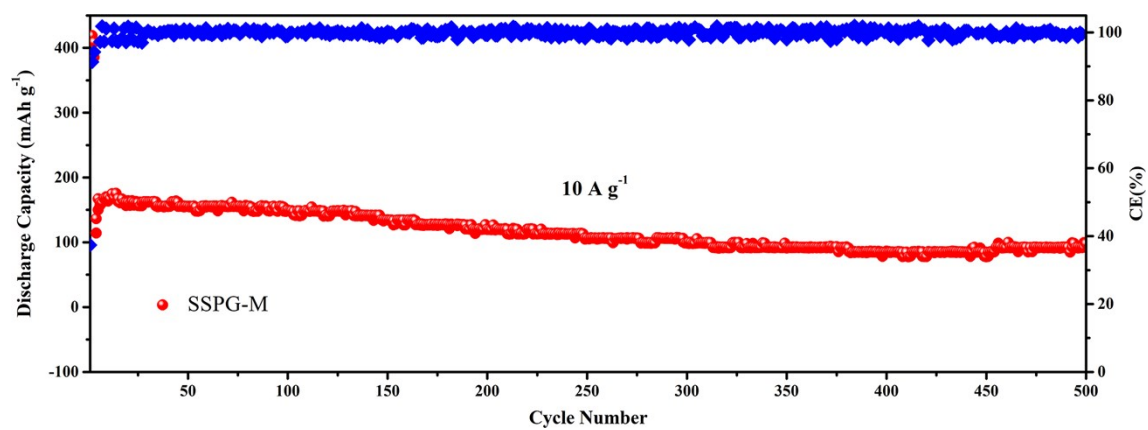

**Fig. S6. Cycling performance of SSPG-M at 10 A g<sup>-1</sup> between 0.01-1.5 V.**

**Fig. S6** exhibits the long cycle performance of SSPG-M at 10 A g<sup>-1</sup> between 0.01 and 1.5 V. We can observe that the capacity still remains 98 mA h g<sup>-1</sup> after 500 cycles. Besides, the coulombic efficiency is stabilized around 100% all along.

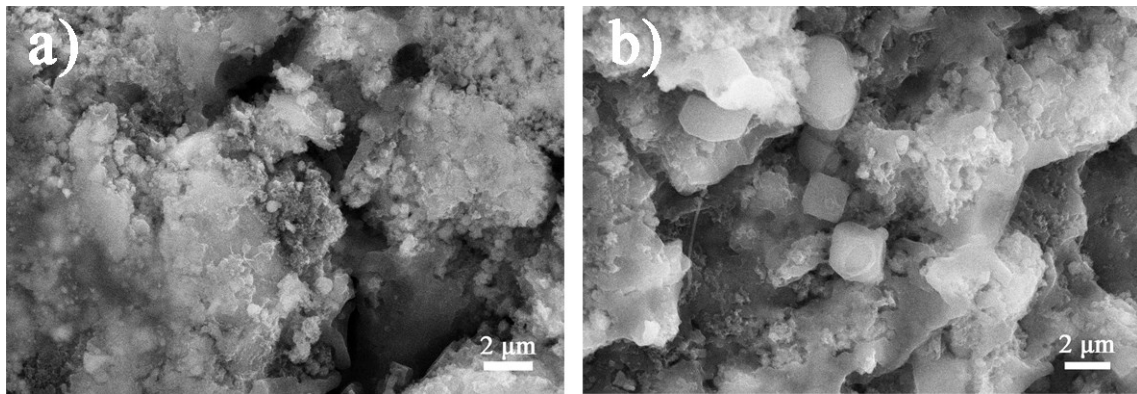

**Fig. S7. a-b) SEM images of Sb/SbPO<sub>4</sub>@3D-G electrode after 100 cycles at 0.1 A g<sup>-1</sup>.**

**Fig. S7** shows the SEM images of Sb/SbPO<sub>4</sub>@3D-G electrode after 100 cycles at 0.1 A g<sup>-1</sup>. It can be seen that the octahedron morphology of nanoparticles could be well maintained after 100 cycles, although experiencing inevitable volume expansion.



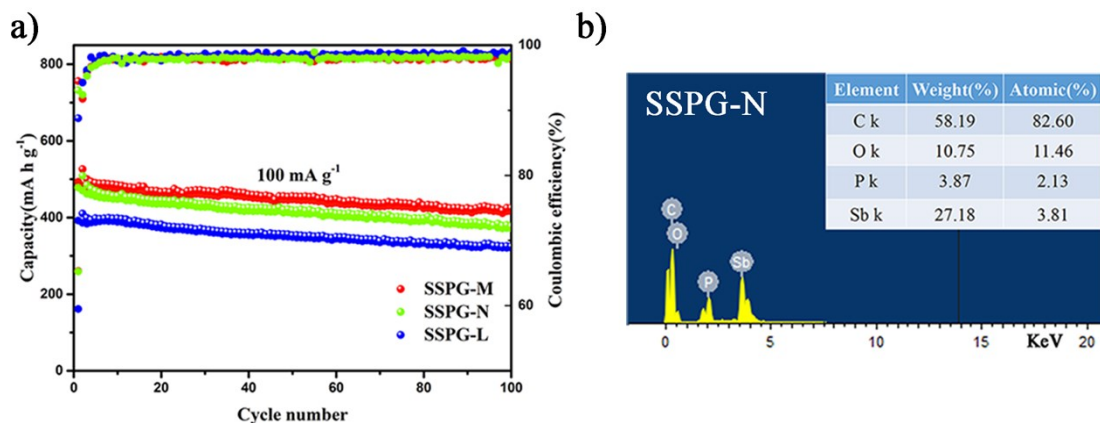

**Fig. S8. a) Cycling performance of SSPG-M, SSPG-N, SSPG-L electrodes at 100 mA g<sup>-1</sup>; b) EDS spectrum of SSPG-N sample.**

**Fig. S8** deeply discusses the issue that more content of Sb can provide more capacity and higher initial coulombic efficiency. The contents of elements in SSPG-N is shown in Fig. S8b. It is obvious that the capacity gets promoted as the content of Sb in the sample increased in Fig. S8a. Moreover, more content of Sb can also provide higher initial coulombic efficiency.

**Table S1** Comparison of the electrochemical performance of Sb-based materials for SIBs.

| Materials                                                | Shape                   | Remaining capacity<br>(mA h g <sup>-1</sup> )                       | Rate capability<br>(mA h g <sup>-1</sup> )              | Ref.         |
|----------------------------------------------------------|-------------------------|---------------------------------------------------------------------|---------------------------------------------------------|--------------|
| Sb <sub>47</sub> Fe <sub>39</sub> P <sub>14</sub>        | fiber-like<br>structure | 422mA h g <sup>-1</sup> @0.1A g <sup>-1</sup><br>after 200 cycles   | 441.7—245.8—477.5<br>(0.1—2—0.1 A g <sup>-1</sup> )     | 1            |
| Sb <sub>2</sub> S <sub>3</sub> /carbon-<br>silicon oxide | nanofibers              | 321mA h g <sup>-1</sup> @0.2A g <sup>-1</sup><br>after 200 cycles   | 532—221— ~480<br>(0.1—5—0.1 A g <sup>-1</sup> )         | 2            |
| Sb <sub>2</sub> Se <sub>3</sub> /C                       | amorphous               | 378mA h g <sup>-1</sup> @0.05A g <sup>-1</sup><br>after 50 cycles   | 270mA h g <sup>-1</sup> @1.2 A g <sup>-1</sup>          | 3            |
| Sb-C                                                     | rod-like                | 430.9mA h g <sup>-1</sup> @0.1A g <sup>-1</sup><br>after 100 cycles | 499.8—259.1—405.6<br>(0.05—2.5—0.05 A g <sup>-1</sup> ) | 4            |
| Sb/N-doped<br>porous carbon                              | 1D structure            | 400.9mA h g <sup>-1</sup> @0.1A g <sup>-1</sup><br>after 100 cycles | 502.9—50.4—421.8<br>(0.05—5—0.05 A g <sup>-1</sup> )    | 5            |
| SbPO <sub>4</sub> /rGO                                   | layered<br>structure    | 280mA h g <sup>-1</sup> @0.5A g <sup>-1</sup><br>after 100 cycles   | 323—214— ~320<br>(0.1—5—0.1 A g <sup>-1</sup> )         | 6            |
| Sb@TiO <sub>2-x</sub>                                    | nanoplates              | 540mA h g <sup>-1</sup> @0.1A g <sup>-1</sup><br>after 100 cycles   | 571—429—562<br>(0.1—3.2—0.1 A g <sup>-1</sup> )         | 7            |
| SnS/SnSb@C                                               | nanofibers              | 270mA h g <sup>-1</sup> @0.2A g <sup>-1</sup><br>after 200 cycles   | 458—159—425<br>(0.05—2—0.05 A g <sup>-1</sup> )         | 8            |
| Sb/SbPO <sub>4</sub> @3D-G                               | 3D structure            | 425.3mA h g <sup>-1</sup> @0.1A g <sup>-1</sup><br>after 100 cycles | 484.4—236.1—459.4<br>(0.05—5—0.05 A g <sup>-1</sup> )   | This<br>work |

## References

1. W. Rong, J. You, X. Zheng, G. Tu, S. Tao, P. Zhang, Y. Wang and J. Li, Electrodeposited binder-free antimony iron phosphorous composites as advanced anodes for sodium-ion batteries, *ChemElectroChem*, 2019, **6**, 5420-5427.
2. J. Xie, J. Xia, Y. Yuan, L. Liu, Y. Zhang, S. Nie, H. Yan and X. Wang, Sb<sub>2</sub>S<sub>3</sub> embedded in carbon-silicon oxide nanofibers as high-performance anode materials for lithium-ion and sodium-ion batteries, *J. Power Sources*, 2019, **435**, 226762.
3. K. Nam and C. Park, 2D layered Sb<sub>2</sub>Se<sub>3</sub>-based amorphous composite for high-performance Li and Na-ion battery anodes, *J. Power Sources*, 2019, **433**, 126639.
4. L. Fan, J. Zhang, J. Cui, Y. Zhu, J. Liang, L. Wang and Y. Qian, Electrochemical performance of rod-like Sb-C composite as anodes for Li-ion and Na-ion batteries, *J. Mater. Chem. A.*, 2015, **3**, 3276-3280.
5. Q. Yang, J. Zhou, G. Zhang, C. Guo, M. Li, Y. Zhu and Y. Qian, Sb nanoparticles uniformly dispersed in 1-D N doped porous carbon as anodes for Li-ion and Na-ion batteries, *J. Mater. Chem. A.*, 2017, **5**, 12144-12148.
6. J. Pan, S. Chen, Q. Fu, Y. Sun, Y. Zhang, N. Lin, P. Gao, J. Yang and Y. Qian, Layered-structure SbPO<sub>4</sub>/reduced graphene oxide: An advanced anode material for sodium ion batteries, *ACS Nano*, 2018, **12**, 12869-12878.
7. P. Li, X. Guo, S. Wang, R. Zang, X. Li, Z. Man, P. Li, S. Liu, Y. Wu and G. Wang, Two-dimensional Sb@TiO<sub>2-x</sub> nanoplates as a high performance anode material for sodium-ion batteries, *J. Mater. Chem. A.*, 2019, **7**, 2553-2559.
8. J. Zhu, C. Shang, Z. Wang, J. Zhang, Y. Liu, S. Gu, L. Zhou, H. Cheng, Y. Gu and Z. Lu, SnS/SnSb@C nanofibers with enhanced cycling stability via vulcanization as an anode for sodium-ion batteries, *ChemElectroChem*, 2018, **5**, 1098-1104.
